# Supplementary material
Source: Springer Nature journal article supplement (https://www.springermedizin.de/resource/supplementary/12913_2008_671_MOESM1_ESM.pdf/9535286)
Supplement: MOESM1 [file 9535286]

# Positive scores

| Node 0    |        |
|-----------|--------|
| Mean      | 15.239 |
| Std. Dev. | 6.944  |
| n         | 117    |
| %         | 100.0  |
| Predicted | 15.239 |

Age

Improvement=7.291

$\leq 27.50$

$> 27.50$

| Node 1    |        |
|-----------|--------|
| Mean      | 10.742 |
| Std. Dev. | 6.638  |
| n         | 31     |
| %         | 26.5   |
| Predicted | 10.742 |

| Node 2    |        |
|-----------|--------|
| Mean      | 16.860 |
| Std. Dev. | 6.342  |
| n         | 86     |
| %         | 73.5   |
| Predicted | 16.860 |

Worry

Improvement=3.562

$\leq 9.50$

$> 9.50$

| Node 3    |        |
|-----------|--------|
| Mean      | 22.077 |
| Std. Dev. | 5.330  |
| n         | 13     |
| %         | 11.1   |
| Predicted | 22.077 |

| Node 4    |        |
|-----------|--------|
| Mean      | 15.932 |
| Std. Dev. | 6.079  |
| n         | 73     |
| %         | 62.4   |
| Predicted | 15.932 |

Age

Improvement=3.789

$\leq 48.50$

$> 48.50$

| Node 5    |        |
|-----------|--------|
| Mean      | 14.043 |
| Std. Dev. | 6.073  |
| n         | 46     |
| %         | 39.3   |
| Predicted | 14.043 |

| Node 6    |        |
|-----------|--------|
| Mean      | 19.148 |
| Std. Dev. | 4.630  |
| n         | 27     |
| %         | 23.1   |
| Predicted | 19.148 |
